# Supplementary material
Source: Springer Nature journal article supplement (https://www.springermedizin.de/resource/supplementary/12936_2013_2991_MOESM1_ESM.pdf/9544776)
Supplement: MOESM1 [file 9544776]

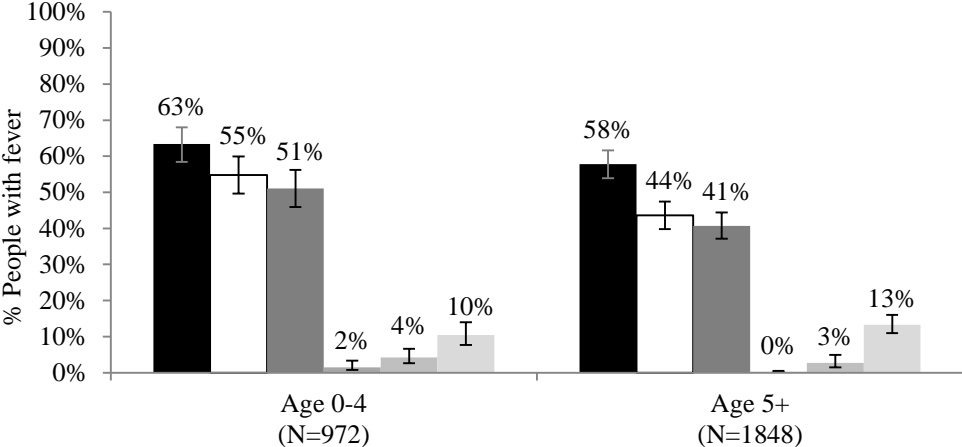

■ Any source outside of the home

□ Appropriate provider (CHW, public or private facility)

■ Public facility

■ CHW

■ Private facility

■ Other private (pharmacy, shop)
